# Supplementary material
Source: PubMed Central journal article supplement (PMC8142130)
Supplement: sj-pdf-1-jcb-10.1177_0271678X20962594.pdf [file sj-pdf-1-jcb-10.1177_0271678X20962594.pdf]

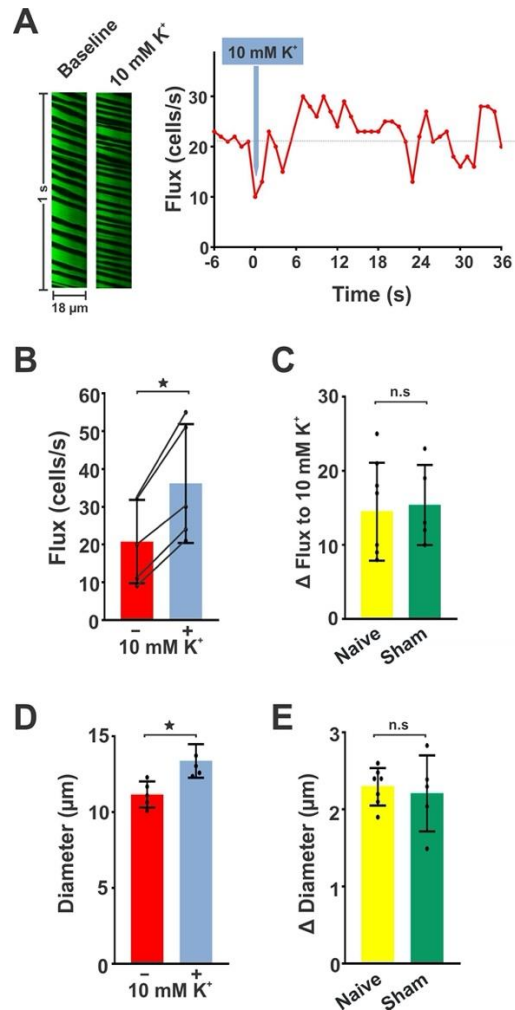

**Supplementary figure 1. K<sup>+</sup>-induced hyperemia is unaffected by surgical procedures.** (A) Left: Baseline and peak distance–time plots of capillary line scans showing hyperemia to the ejection of 10 mM K<sup>+</sup> onto a capillary after sham surgery. Right: typical experimental time-course of RBC flux binned at 1-s intervals before and after pressure ejection of 10 mM K<sup>+</sup> (300 ms, 5 ± 1 psi; grey arrow) onto a capillary, demonstrating hyperemia to K<sup>+</sup> delivery. Summary data showing (B) RBC flux in response to 10 mM K<sup>+</sup> in sham control mice (21 ± 11 vs. 36 ± 16 cells/s, n=5 paired experiments, 5 mice; \*p=0.003, paired t-test) and (C) comparison of flux change in response to 10 mM K<sup>+</sup> in naïve and sham control mice (14 ± 7 vs. 15 ± 5 cells/s, p=0.804, unpaired t-test). Bar graph summarizing (D) arteriole diameter before and after capillary application of 10 mM K<sup>+</sup> in sham control mice (11.2 ± 0.86 μm vs. 13.4 ± 1.10 μm, n=5

paired experiments, 5 mice; \* $p=0.008$ , paired t-test) and (E) comparison of diameter change with 10 mM  $K^+$  in naïve and sham control mice ( $p=0.6912$ , unpaired t-test).
